# Supplementary material for: Trehalose Protects Maize Plants from Salt Stress and Phosphorus Deficiency
Source: PubMed Central journal article supplement (PMC6963808; doi:10.3390/plants8120568), 2019-12-04
Supplement: plants-08-00568-s001.pdf [file plants-08-00568-s001.pdf]

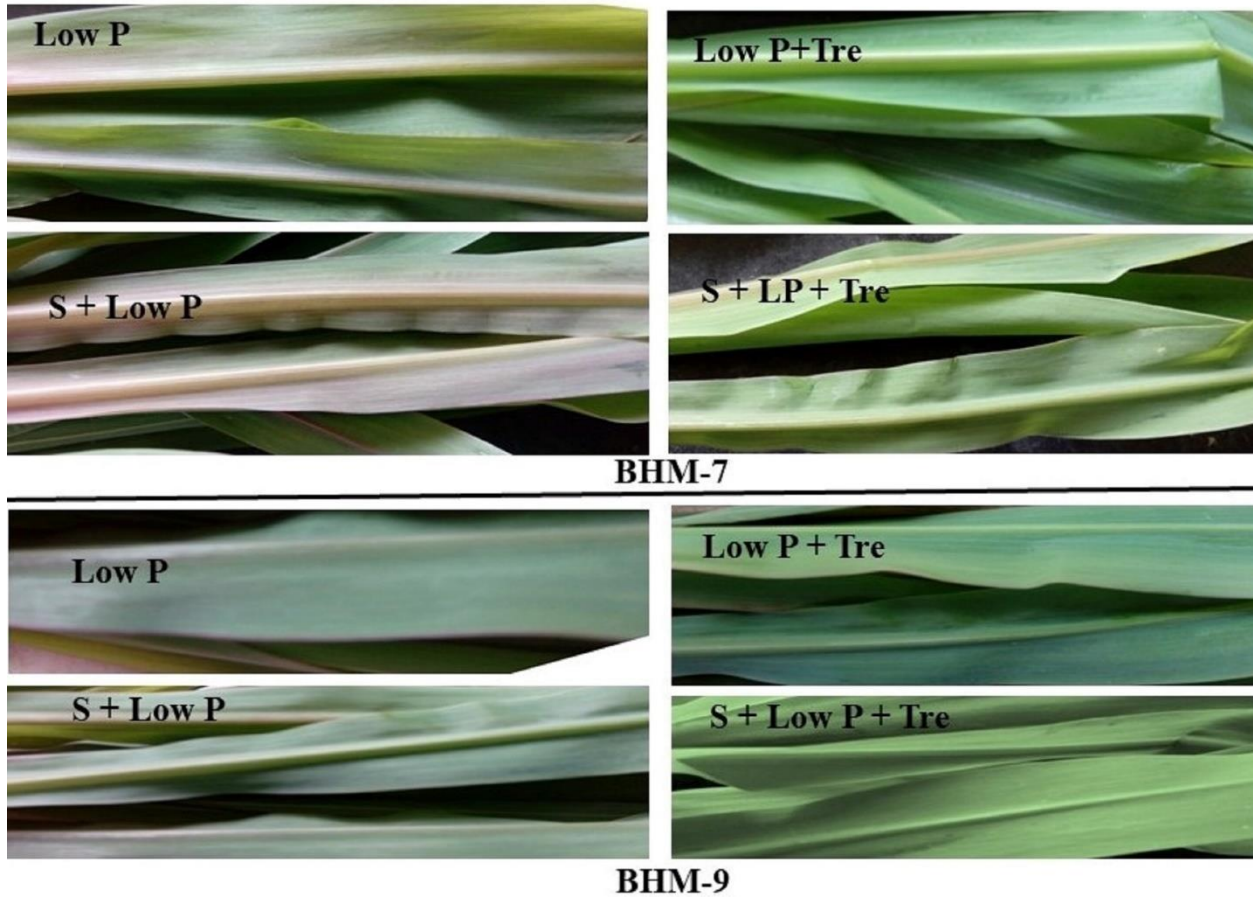

**Supplementary Fig. 1.** Effect of trehalose (Tre, 10 mM) on P deficiency symptom in maize seedlings of BHM-7 and BHM-9 under salinity (S, 150 mM) and low P ( $5 \mu\text{M KH}_2\text{PO}_4$ ) stress. Seedlings were imposed stress for fifteen days
